# Supplementary material for: Effects of a co-bacterial agent on the growth, disease control, and quality of ginseng based on rhizosphere microbial diversity
Source: BMC Plant Biol. 2024 Jul 8;24:647. doi: 10.1186/s12870-024-05347-3 (PMC11229274; doi:10.1186/s12870-024-05347-3)
Supplement: Supplementary file 1 — Supplementary Material 1: Table S1. Statistical results of bacterial sequencing data processing [file 12870_2024_5347_MOESM1_ESM.xlsx]

## Sheet: Sheet1
Table S1 Statistical results of bacterial sequencing data processing
Sample ID	Raw Reads	Clean Reads	Effective Reads	AvgLen(bp)	GC(%)	Q20(%)	Q30(%)	Effective(%)
CK1	121341	120592	116874	418	56.51	98.61	94.92	96.32
CK2	112060	111448	108551	416	56.41	98.74	95.26	96.87
CK3	112322	111645	108084	419	56.35	98.66	95.06	96.23
EM1	98930	98428	94836	413	56.62	98.89	95.71	95.86
EM2	94331	93885	87351	414	57.29	98.89	95.69	92.6
EM3	121540	120757	113814	416	57.21	98.66	95.03	93.64
PS1	108781	108191	106203	411	57.12	98.86	95.62	97.63
PS2	106294	105688	98443	415	57.03	98.78	95.38	92.61
PS3	69776	69464	68338	413	56.8	98.96	95.94	97.94
PB1	100005	99497	93536	415	57.55	98.83	95.52	93.53
PB2	100874	100339	98181	415	57.31	98.83	95.51	97.33
PB3	69402	69093	67554	412	57.86	98.97	95.95	97.34
Raw Reads are the number of raw reads obtained by sequencing. Clean Reads are the number of high-quality reads obtained after quality control of the original sequence; Effective Reads are the number of effective sequences after clean reads by splicing (double-ended), filtering the length and chimeras; AvgLen (bp) is the average sequence length of the samples; GC (%) is the percentage of G and C b…
