# Supplementary material for: Effects of a co-bacterial agent on the growth, disease control, and quality of ginseng based on rhizosphere microbial diversity
Source: BMC Plant Biol. 2024 Jul 8;24:647. doi: 10.1186/s12870-024-05347-3 (PMC11229274; doi:10.1186/s12870-024-05347-3)
Supplement: Supplementary file 2 — Supplementary Material 2: Table S2. Statistical results of fungi sequencing data processing [file 12870_2024_5347_MOESM2_ESM.xlsx]

## Sheet: Sheet1
Table S2 Statistical results of fungi sequencing data processing
Sample ID	Raw Reads	Clean Reads	Effective Reads	AvgLen(bp)	GC(%)	Q20(%)	Q30(%)	Effective(%)
CK1	110451	109441	109322	237	47.1	99.88	99.27	94.43
CK2	103011	102210	102073	245	47.46	99.86	99.18	94.57
CK3	95183	94517	94350	238	45.28	99.89	99.3	94.45
BS1	100140	99358	99220	246	47.31	99.86	99.18	94.98
BS2	94646	94039	93907	241	45.6	99.87	99.24	95.14
BS3	104680	103753	103591	245	47.33	99.86	99.17	94.7
PS1	99502	98754	98573	241	45.26	99.87	99.24	95.06
PS2	96932	96191	95961	245	47.26	99.87	99.22	94.68
PS3	99502	98754	98573	245	47.38	99.87	99.2	95.09
PB1	95574	94878	94700	240	45.04	99.86	99.17	93.48
PB2	96895	96231	96085	245	47.28	99.87	99.21	94.95
PB3	55289	54870	54734	240	47.46	99.88	99.27	94.87
Raw Reads are the number of raw reads obtained by sequencing. Clean Reads are the number of high-quality reads obtained after quality control of the original sequence; Effective Reads are the number of effective sequences after clean reads by splicing (double-ended), filtering the length and chimeras; AvgLen (bp) is the average sequence length of the samples; GC (%) is the percentage of G and C b…
