# Supplementary material for: Effects of a co-bacterial agent on the growth, disease control, and quality of ginseng based on rhizosphere microbial diversity
Source: BMC Plant Biol. 2024 Jul 8;24:647. doi: 10.1186/s12870-024-05347-3 (PMC11229274; doi:10.1186/s12870-024-05347-3)
Supplement: Supplementary file 8 — Supplementary Material 8: Table S8. Classification of ginseng rhizosphere soil bacterial OTUs at the phylum and species levels [file 12870_2024_5347_MOESM8_ESM.xlsx]

## Sheet: Sheet1
Table S8 Classification of ginseng rhizosphere soil bacterial OTUs at the phylum and species levels
Sample	Kindom	Phylum	Class	Order	Family	Genus	Species
CK1	2	30	72	167	286	400	430
CK2	1	27	59	153	270	404	440
CK3	2	29	71	173	300	453	490
BS1	1	28	62	155	271	413	460
BS2	1	28	66	156	268	405	440
BS3	1	29	72	172	283	435	474
PS1	1	30	76	187	328	467	503
PS2	2	25	64	148	243	322	354
PS3	1	25	53	133	223	279	302
PB1	1	28	68	165	277	399	436
PB2	1	28	65	161	278	389	421
PB3	1	24	51	135	218	307	334
Total	2	35	92	255	484	856	1015
