# Supplementary material for: Effects of a co-bacterial agent on the growth, disease control, and quality of ginseng based on rhizosphere microbial diversity
Source: BMC Plant Biol. 2024 Jul 8;24:647. doi: 10.1186/s12870-024-05347-3 (PMC11229274; doi:10.1186/s12870-024-05347-3)
Supplement: Supplementary file 9 — Supplementary Material 9: Table S9. Classification of ginseng rhizosphere soil fungal OTUs at the phylum and species levels [file 12870_2024_5347_MOESM9_ESM.xlsx]

## Sheet: Sheet1
Table S9 Classification of ginseng rhizosphere soil fungal OTUs at the phylum and species levels
Sample	Kindom	Phylum	Class	Order	Family	Genus	Species
CK1	1	14	42	96	199	399	499
CK2	1	14	41	92	203	403	499
CK3	1	14	42	98	205	396	491
BS1	1	12	40	95	194	374	476
BS2	1	11	38	94	210	395	487
BS3	1	13	41	99	206	385	480
PS1	1	11	35	91	204	398	506
PS2	1	14	43	103	213	417	519
PS3	1	14	41	97	213	410	537
PB1	1	12	34	90	196	390	482
PB2	1	12	37	97	205	403	521
PB3	1	11	36	91	190	363	429
Total	1	16	51	124	294	714	1115
