# Supplementary material for: Effects of a co-bacterial agent on the growth, disease control, and quality of ginseng based on rhizosphere microbial diversity
Source: BMC Plant Biol. 2024 Jul 8;24:647. doi: 10.1186/s12870-024-05347-3 (PMC11229274; doi:10.1186/s12870-024-05347-3)
Supplement: Supplementary file 14 — Supplementary Material 14: Table S14. Bacterial community function level1, 2 Relative Abundance (%) [file 12870_2024_5347_MOESM14_ESM.xlsx]

## Sheet: Sheet1
Table S14 Bacterial community function level1, 2 Relative Abundance (%)
Level1	Level2	CK1	CK2	CK3	BS1	BS2	BS3	PS1	PS2	PS3	PB1	PB2	PB3
Metabolism	Carbohydrate metabolism	8.77885	8.82511	8.83099	8.94851	8.75168	8.89153	8.97967	8.7251	8.78005	8.77203	8.75895	8.83558
	Lipid metabolism	2.39981	2.40658	2.42632	2.35273	2.40593	2.4033	2.36908	2.34078	2.35995	2.32341	2.27475	2.27958
	Metabolism of cofactors and vitamins	4.10408	4.1175	4.09412	4.14255	4.12447	4.10415	4.15217	4.1565	4.15564	4.16378	4.22569	4.20327
	Nucleotide metabolism	3.01087	3.01058	2.99937	3.07314	2.99968	3.01792	3.06179	3.07129	3.05944	3.09984	3.12081	3.16681
	Amino acid metabolism	7.49277	7.49126	7.53441	7.44252	7.56123	7.56461	7.50995	7.44367	7.42851	7.30787	7.25492	7.30337
Metabolism	Metabolism of terpenoids and polyketides	1.21439	1.23462	1.23797	1.23517	1.25622	1.24884	1.24665	1.22981	1.22219	1.23365	1.23299	1.25519
	Xenobiotics biodegradation and metabolism	1.80946	1.74399	1.80556	1.55765	1.83386	1.76112	1.60074	1.60623	1.63801	1.46276	1.41116	1.33435
	Metabolism of other amino acids	1.65266	1.6237	1.63801	1.55862	1.62326	1.58949	1.53891	1.56645	1.57078	1.5201	1.49094	1.46339
	Energy metabolism	4.4068	4.43624	4.41841	4.46081	4.50043	4.42607	4.41709	4.45932	4.42515	4.45919	4.46812	4.51258
	Glycan biosynthesis and metabolism	1.22711	1.19104	1.18128	1.23702	1.12126	1.17901	1.16564	1.2307	1.20546	1.2668	1.24753	1.24666
	Biosynthesis of other secondary metabolites	0.932835	0.943725	0.932906	0.968085	0.912805	0.935565	0.978789	0.96046	0.977841	0.992887	1.01256	1.0157
Cellular Processes	Aging	0.453885	0.435526	0.440575	0.409643	0.447464	0.431334	0.396609	0.417709	0.413177	0.405975	0.396263	0.365846
	Cell motility	0.99601	1.01042	0.969845	0.899383	0.93911	0.907144	1.009	1.07076	1.07667	1.08618	1.05008	0.972102
	Cell growth and death	0.748655	0.704297	0.712323	0.658826	0.689895	0.680089	0.643316	0.687694	0.682111	0.677884	0.678523	0.645244
	Transport and catabolism	0.276914	0.264943	0.270757	0.251263	0.25614	0.258949	0.249048	0.248786	0.246688	0.247622	0.232707	0.21852
	Cellular community - prokaryotes	1.50337	1.5478	1.54845	1.49451	1.57724	1.50823	1.55824	1.5616	1.60596	1.54932	1.55419	1.63561
Environmental Information Processing	Membrane transport	3.18012	3.15744	3.19095	3.07521	3.30265	3.18095	3.14407	3.11669	3.17319	3.10849	3.02498	3.04121
	Signal transduction	2.64009	2.59437	2.60346	2.50634	2.63418	2.57019	2.5102	2.58186	2.56802	2.55346	2.45957	2.34617
	Signaling molecules and interaction	0.033809	0.0345224	0.0340897	0.036433	0.0341222	0.0348485	0.0361916	0.0365239	0.0364812	0.0373686	0.0387003	0.0401015
Genetic Information Processing	Transcription	0.129165	0.129582	0.127706	0.132954	0.129425	0.129222	0.134869	0.133081	0.134016	0.136726	0.140853	0.13961
	Folding, sorting and degradation	1.44517	1.46214	1.44652	1.49196	1.44165	1.45011	1.47962	1.48473	1.4798	1.50395	1.53269	1.54069
	Translation	2.92172	2.98844	2.94582	3.13253	2.93244	2.99473	3.09959	3.14299	3.12568	3.21551	3.30109	3.42808
	Replication and repair	2.40817	2.39985	2.39122	2.46627	2.37788	2.40017	2.49185	2.48119	2.4705	2.52546	2.60087	2.59072
Human Diseases	Neurodegenerative diseases	0.407071	0.365962	0.37981	0.308527	0.385897	0.351484	0.293855	0.331286	0.333236	0.298596	0.292844	0.240079
	Endocrine and metabolic diseases	0.236537	0.231249	0.230496	0.225406	0.234475	0.227577	0.220697	0.228702	0.232034	0.226127	0.232302	0.222165
	Infectious diseases: Bacterial	0.3887	0.376722	0.377011	0.357973	0.380566	0.374235	0.362102	0.373668	0.363434	0.381533	0.372213	0.346981
	Infectious diseases: Parasitic	0.0920115	0.0856342	0.0886206	0.0777104	0.0864564	0.0841553	0.0699613	0.0758472	0.0771957	0.0711914	0.0637878	0.060566
	Cancers: Overview	0.53486	0.505584	0.51656	0.48335	0.532399	0.50677	0.476485	0.48088	0.490128	0.466375	0.468406	0.427858
	Cancers: Specific types	0.221715	0.200153	0.20963	0.16595	0.212702	0.190897	0.154752	0.176729	0.182721	0.15766	0.153572	0.126491
	Immune diseases	0.0232706	0.0230081	0.023559	0.0220886	0.0271602	0.0244355	0.027342	0.0225635	0.0237828	0.0256357	0.0215901	0.0237063
	Cardiovascular diseases	0.0387247	0.0345772	0.0367874	0.0271571	0.0358219	0.032535	0.0244045	0.0285544	0.0279834	0.027805	0.0257044	0.0204051
	Infectious diseases: Viral	0.107361	0.0952715	0.100537	0.0748933	0.0960336	0.088112	0.0675676	0.0793862	0.0790161	0.0763606	0.0719821	0.0581014
	Nervous system	0.166784	0.172222	0.170544	0.17023	0.176	0.171317	0.173122	0.16955	0.171589	0.168881	0.165944	0.173929
Organismal Systems	Immune system	0.0285941	0.0257659	0.0270496	0.0257348	0.0261089	0.0265196	0.0232086	0.0232883	0.022791	0.0259221	0.0238133	0.0176062
	Environmental adaptation	0.141349	0.137002	0.136951	0.131748	0.132728	0.132435	0.129535	0.135993	0.135655	0.13665	0.13135	0.122672
	Endocrine system	0.580408	0.575767	0.586306	0.560238	0.593866	0.584447	0.562506	0.543456	0.541295	0.541117	0.53192	0.509461
	Digestive system	0.0234556	0.0234369	0.0244724	0.0230152	0.0260621	0.025067	0.019636	0.0217971	0.0191402	0.0212464	0.0178463	0.0188583
	Circulatory system	0.0405041	0.0356559	0.0367149	0.0285313	0.0397826	0.0343694	0.026464	0.0327418	0.0340884	0.0248173	0.025627	0.0186477
Drug Development	Drug resistance: Antimicrobial	0.828033	0.801761	0.801851	0.792184	0.790852	0.788799	0.781485	0.812408	0.812615	0.8218	0.826783	0.797011
	Drug resistance: Antineoplastic	0.133648	0.115779	0.122605	0.0887642	0.128215	0.109417	0.0828235	0.100826	0.109604	0.0845638	0.0838942	0.064473
Global Map	Global and overview maps	42.1534	42.3589	42.2688	42.8234	42.1623	42.4973	42.6552	42.531	42.4324	42.7151	42.9094	43.0964
